# Supplementary material
Source: PubMed Central journal article supplement (PMC3359869)
Supplement: NIHMS377532-supplement-Sup_Fig2.pdf [file NIHMS377532-supplement-Sup_Fig2.pdf]

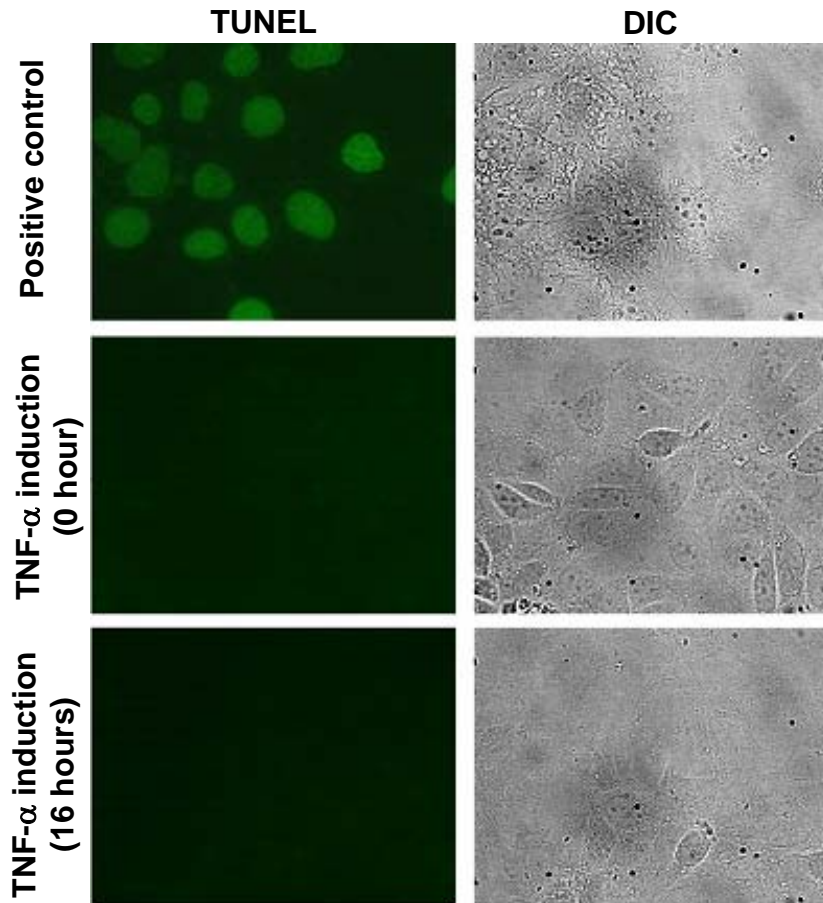

**Supplemental Figure 2. TUNEL staining of the TNF- $\alpha$  treated IMCD cells.** The loss of proper localization of PC2 was not due to cell death, as the TNF- $\alpha$ -treated cells showed normal morphology and were negative for TUNEL staining. Fixed cells treated with TACS-nuclease were used as the positive control.
