# Supplementary material
Source: PubMed Central journal article supplement (PMC3359869)
Supplement: NIHMS377532-supplement-Sup_Fig3.pdf [file NIHMS377532-supplement-Sup_Fig3.pdf]

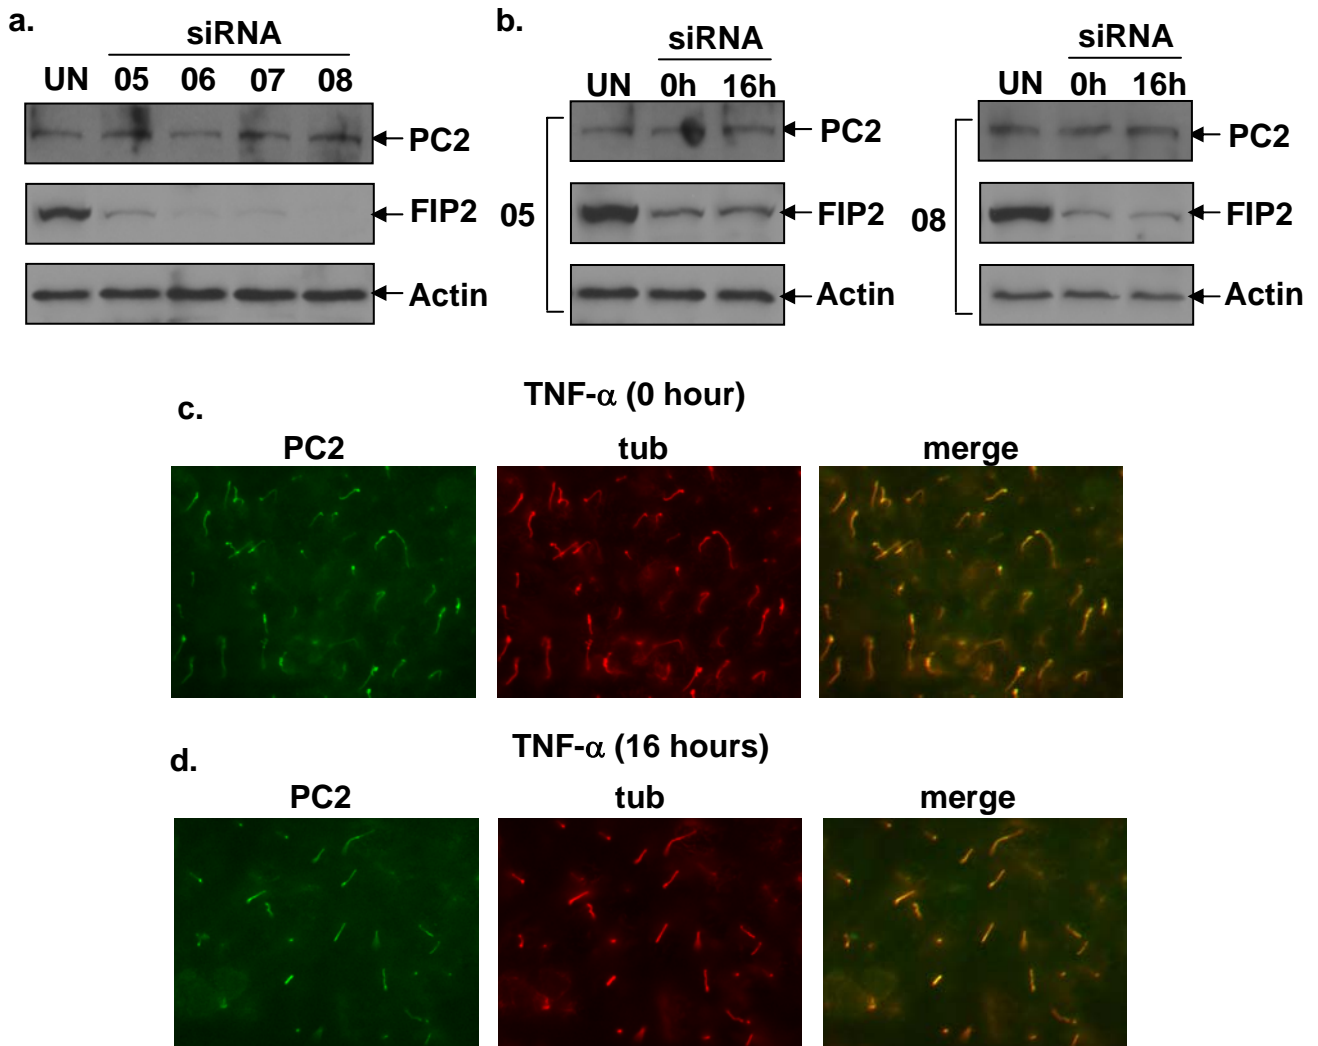

**Supplemental Figure 3. Transfection of siRNA against FIP2 into IMCD cells inhibited FIP2 expression and rescued the TNF- $\alpha$  effect on PC2 localization.** **a**, IMCD cells transfected with 4 different siRNA against FIP2 showing diminished FIP2 expression. UN, untransfected control. **b**, Western blot to determine the FIP2 levels in IMCD cells that were transfected with siRNA#05 and #08 and then treated with TNF- $\alpha$  for 16 hours. **c**, **d**, Immunostaining with YCC2 anti-PC2 antibody of the IMCD cells transfected with siRNA#08 before and after TNF- $\alpha$  induction shows that the siRNA rescued the PC2 cilia localization in cells treated with TNF- $\alpha$ .
