# Supplementary material
Source: PubMed Central journal article supplement (PMC3359869)
Supplement: NIHMS377532-supplement-Sup_Fig4.pdf [file NIHMS377532-supplement-Sup_Fig4.pdf]

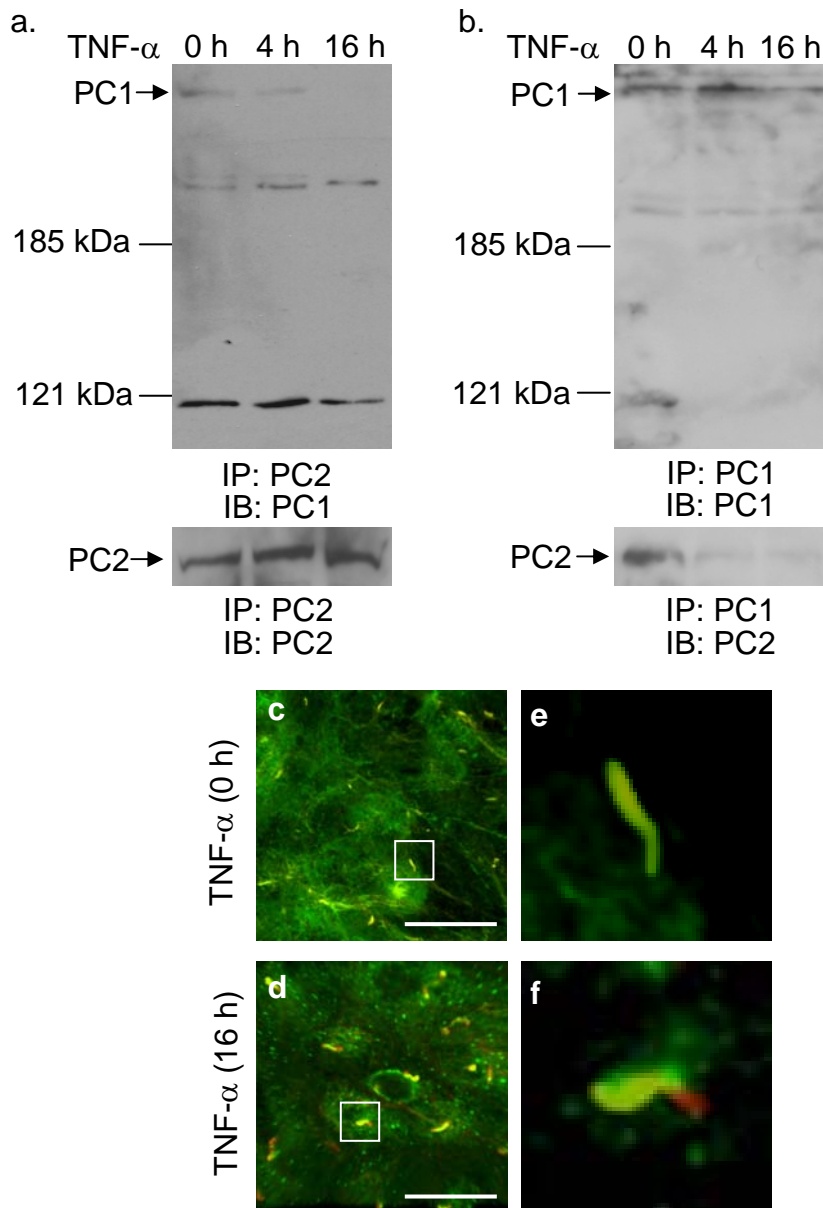

**Supplemental Figure 4. TNF- $\alpha$  disrupts PC1 and PC2 complex formation but not PC1 cilia localization.** **a** and **b**, Reciprocal co-immunoprecipitation of PC1 and PC2. After TNF- $\alpha$  induction, PC1 failed to be co-immunoprecipitated by a PC2 antibody (**a**), or PC2 by a PC1 antibody (**b**), even though the same amounts of PC1 and PC2 were immunoprecipitated with their respective antibodies at all time points. **c** and **d**, Merged double immunofluorescence staining of endogenous PC1 (*green*) and acetylated tubulin (*red*) before (**c**) or after (**d**) treatment with TNF- $\alpha$ , observed with confocal microscopy. The images shown are projections of all confocal sections. **e** and **f** show enlarged cilia images in the boxed regions in **c** and **d**, respectively.
