# Supplementary material
Source: PubMed Central journal article supplement (PMC3359869)
Supplement: NIHMS377532-supplement-Sup_Fig5.pdf [file NIHMS377532-supplement-Sup_Fig5.pdf]

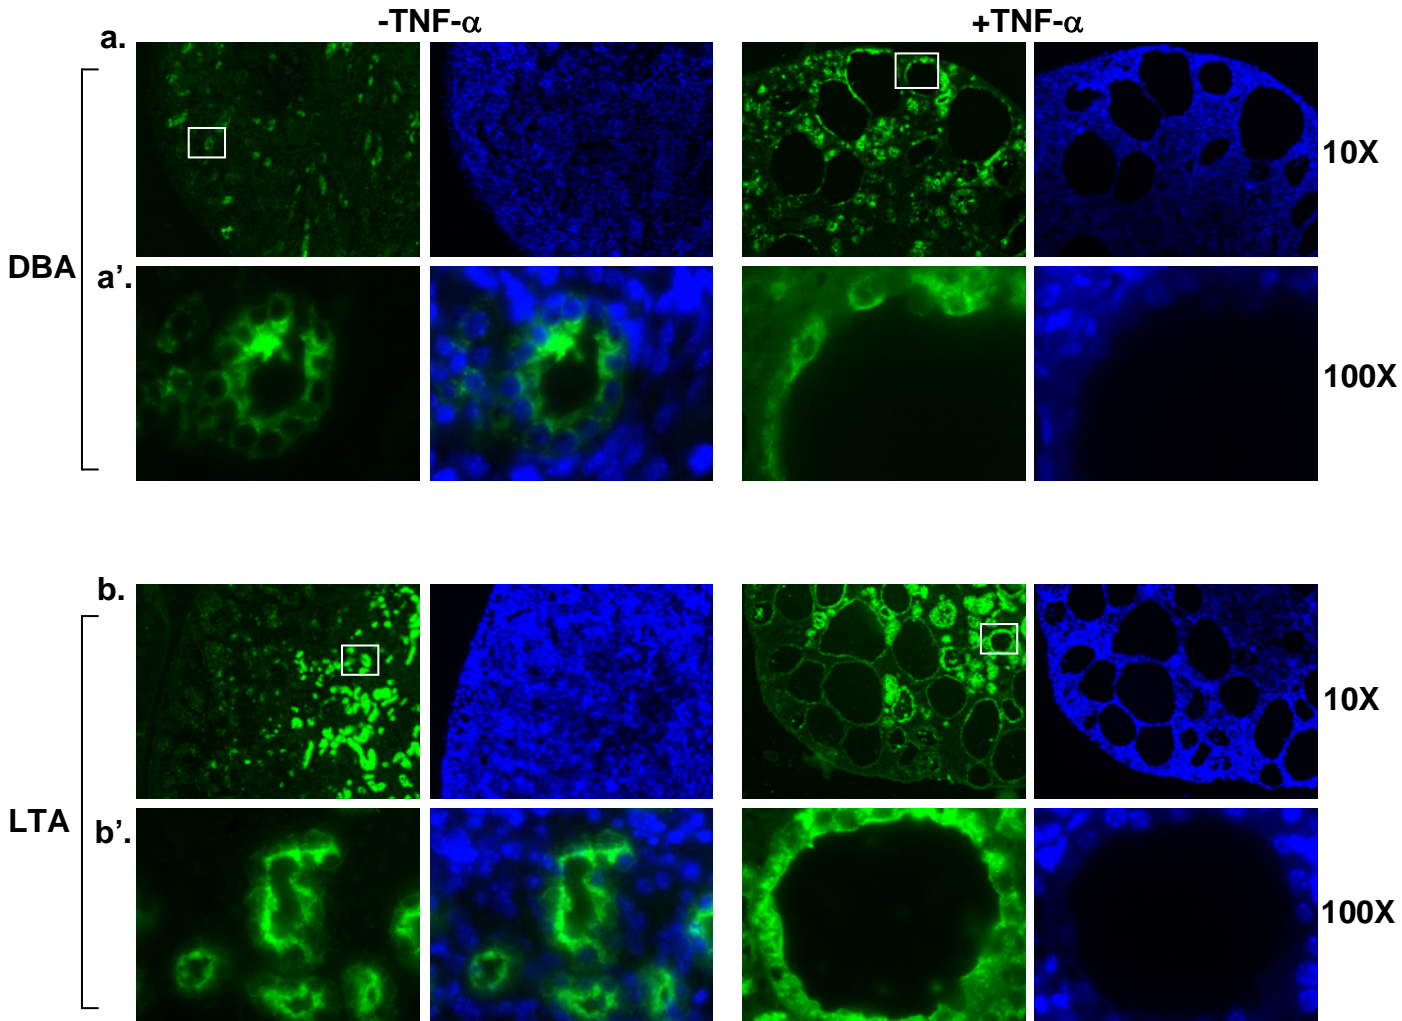

**Supplemental Figure 5. TNF- $\alpha$  initiates cyst formation from collecting ducts and proximal tubules.** TNF- $\alpha$  treated (right panels) or untreated (left panels) *Pkd2*<sup>+/-</sup> embryonic kidneys were stained with either DBA (a), a collecting duct marker, or LTA (b), a proximal tubule marker. a' and b' show enlarged tubule or cyst images in the boxed regions in a and b, respectively.
