# Supplementary material
Source: PubMed Central journal article supplement (PMC3359869)
Supplement: NIHMS377532-supplement-Sup_Fig6.pdf [file NIHMS377532-supplement-Sup_Fig6.pdf]

+ TNF- $\alpha$ 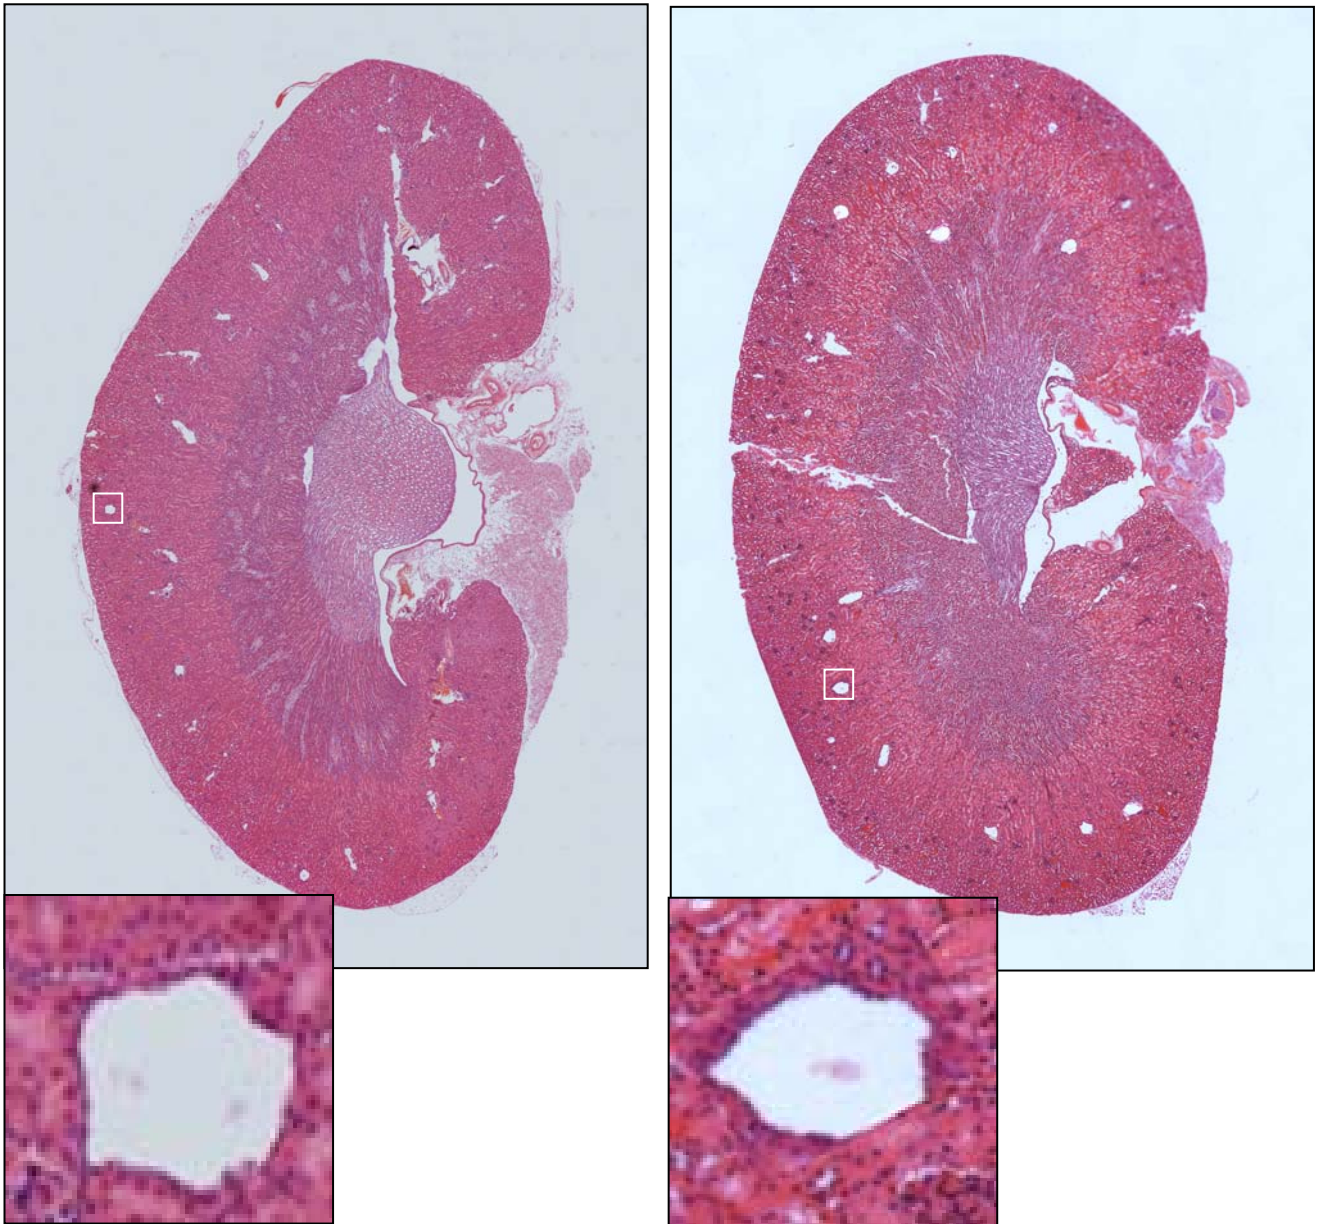

**Supplemental Figure 6. TNF- $\alpha$  caused formation of multiple small cysts in *Pkd2*<sup>+/-</sup> mouse kidneys.** Two *Pkd2*<sup>+/-</sup> mice treated with TNF- $\alpha$  from week 8.5 to week 18.5 showed the presence of multiple kidney cysts. The inset in each image shows cyst in the boxed region at a higher magnification.
